# Supplementary material
Source: bioRxiv or medRxiv preprint supplement (https://medrxiv.org/highwire/filestream/73884/field_highwire_adjunct_files/0/2020.03.18.20037101-1.pdf)
Supplement: Supplementary file [file 2020.03.18.20037101-1.pdf]

## Supplementary Material

### Epidemiology of seasonal coronaviruses: Establishing the context for COVID-19 emergence

Sema Nickbakhsh<sup>a\*</sup>, Antonia Ho<sup>a</sup>, Diogo F.P. Marques<sup>b</sup>, Jim McMenamin<sup>b</sup>, Rory N. Gunson<sup>c</sup>, Pablo R. Murcia<sup>a</sup>

<sup>a</sup>MRC-University of Glasgow Centre for Virus Research, Institute of Infection, Immunity and Inflammation, College of Medical, Veterinary and Life Sciences, University of Glasgow, Glasgow, UK.

<sup>b</sup>Health Protection Scotland, NHS National Services Scotland, G2 6QE Glasgow, UK.

<sup>c</sup>West of Scotland Specialist Virology Centre, NHS Greater Glasgow and Clyde, Glasgow, UK.

**\*Corresponding author:** Sema Nickbakhsh, MRC-University of Glasgow Centre for Virus Research, 646 Bearsden Road, Glasgow, G61 1QH, email: [sema.nickbakhsh@glasgow.ac.uk](mailto:sema.nickbakhsh@glasgow.ac.uk)

**Table S1: Coronavirus detection frequencies among 68,819 patients tested in periods pre and post major waves of H1N1 influenza A pandemic virus circulation, NHS Greater Glasgow and Clyde, Scotland, UK.**

| <b>Measure of seasonal coronavirus (sCoV) detection frequency</b> | <b>Pre-pandemic<br/>Jan 2005 –<br/>Apr 2009</b>            | <b>Post- pandemic<br/>Mar 2011 –<br/>Sep 2017</b>          |
|-------------------------------------------------------------------|------------------------------------------------------------|------------------------------------------------------------|
| Total sCoV detections                                             | 545 <sup>*</sup> (13.34 <sup>a</sup> ; 4.27 <sup>b</sup> ) | 2072 <sup>*</sup> (9.55 <sup>a</sup> ; 3.70 <sup>b</sup> ) |
| CoV-229E detections (% among sCoV-positives)                      | 78 (14.31)                                                 | 382 (18.44)                                                |
| CoV-OC43 detections (% among sCoV-positives)                      | 267 (49.0)                                                 | 1063 (51.30)                                               |
| CoV-NL63 detections (% among sCoV-positives)                      | 164 (30.09)                                                | 474 (22.88)                                                |
| Total number of virus-positive patients <sup>†</sup>              | 4,086                                                      | 21,690                                                     |
| Total number of tested patients                                   | 12,755                                                     | 56,064                                                     |

<sup>\*</sup>Note: a small number (n=278; 9.4% out of 74,519 total episodes) of CoV detections were not typed so individual sCoVs do not sum to total; <sup>a</sup>% among total positive; <sup>b</sup>% among total tested; <sup>†</sup>Patients positive to at least one of influenza A, influenza B, respiratory syncytial virus, human coronavirus, human metapneumovirus, adenovirus, rhinovirus, parainfluenza types 1-4.

**Table S2: Distribution of coronavirus detections by patient sex (%): among patients positive for CoV-229E, CoV-OC43 and CoV-NL63, NHS Greater Glasgow and Clyde, Scotland, UK, 2005-2017**

| <b>Healthcare service setting</b>  | <b>Seasonal coronavirus type</b> | <b>Female</b> | <b>Male</b> |
|------------------------------------|----------------------------------|---------------|-------------|
| General Practice<br>(primary care) | CoV-229E                         | 87 (59.2)     | 60 (40.8)   |
|                                    | CoV-OC43                         | 175 (55.6)    | 140 (44.4)  |
|                                    | CoV-229E                         | 101 (59.8)    | 68 (40.2)   |
| Hospital<br>(secondary care)       | CoV-229E                         | 175 (44.3)    | 211 (54.7)  |
|                                    | CoV-OC43                         | 553 (48.9)    | 577 (51.1)  |
|                                    | CoV-229E                         | 231 (43.3)    | 302 (56.7)  |

**Table S3: Age distribution of coronavirus detections (%): among 12,628 patients tested for CoV-229E, CoV-OC43 and CoV-NL63 in primary care, NHS Greater Glasgow and Clyde, Scotland, UK, 2005-2017**

| Age group | CoV-229E   | CoV-OC43   | CoV-NL63   | Total positive | Total tested |
|-----------|------------|------------|------------|----------------|--------------|
| <1y       | 2 (0.42)   | 14 (2.94)  | 10 (2.10)  | 26             | 477          |
| 1-5y      | 8 (0.56)   | 44 (3.07)  | 30 (2.09)  | 82             | 1433         |
| 6-16y     | 17 (1.18)  | 34 (2.35)  | 18 (1.24)  | 69             | 1446         |
| 17-46y    | 69 (1.39)  | 107 (2.16) | 64 (1.29)  | 240            | 4950         |
| 47-64y    | 34 (1.15)  | 76 (2.58)  | 34 (1.15)  | 144            | 2947         |
| ≥65y      | 17 (1.24)  | 40 (2.91)  | 13 (0.95)  | 70             | 1375         |
| Total     | 147 (1.16) | 315 (2.49) | 169 (1.34) | 631            | 12628        |

**Table S4: Age distribution of coronavirus detections (%): among 61,613 patients tested for CoV-229E, CoV-OC43 and CoV-NL63 in secondary care, NHS Greater Glasgow and Clyde, Scotland, UK, 2005-2017**

| Age group | CoV-229E   | CoV-OC43    | CoV-NL63   | Total positive | Total tested |
|-----------|------------|-------------|------------|----------------|--------------|
| <1y       | 30 (0.42)  | 127 (1.77)  | 87 (1.22)  | 244            | 7159         |
| 1-5y      | 39 (0.37)  | 202 (1.94)  | 111 (1.07) | 352            | 10408        |
| 6-16y     | 39 (0.61)  | 81 (1.26)   | 72 (1.12)  | 192            | 6405         |
| 17-46y    | 81 (0.69)  | 190 (1.61)  | 101 (0.86) | 372            | 11779        |
| 47-64y    | 106 (0.86) | 252 (2.04)  | 86 (0.70)  | 444            | 12341        |
| ≥65y      | 91 (0.67)  | 278 (2.06)  | 76 (0.56)  | 445            | 13521        |
| Total     | 386 (0.63) | 1130 (1.83) | 533 (0.90) | 2049           | 61613        |

**Table S5: Multivariable logistic regression analysis of factors associated with CoV-229E detections**

| Explanatory variable            | Levels                   | Odds ratio | 95% CI    | p-value |
|---------------------------------|--------------------------|------------|-----------|---------|
| Age group                       | 1-5y (Reference)         | 1          | -         | -       |
|                                 | <1y                      | 1.39       | 0.81-2.41 | 0.228   |
|                                 | 6-16y                    | 1.55       | 0.9-2.67  | 0.11    |
|                                 | 17-45y                   | 2.12       | 1.39-3.34 | 0.001*  |
|                                 | 46-64y                   | 2.19       | 1.44-3.47 | <0.001* |
|                                 | ≥65y                     | 2.06       | 1.34-3.27 | 0.002*  |
| Sex                             | Female (Reference)       | 1          | -         | -       |
|                                 | Male                     | 1.23       | 1-1.52    | 0.055*  |
| Healthcare setting <sup>†</sup> | GP (Reference)           | 1          | -         | -       |
|                                 | Hospital                 | 0.57       | 0.46-0.73 | <0.001* |
| Time period <sup>‡</sup>        | Pre-pandemic (Reference) | 1          | -         | -       |
|                                 | Pandemic                 | 2.28       | 1.58-3.28 | <0.001* |
|                                 | Post-pandemic            | 1.11       | 0.84-1.5  | 0.477   |
| Season                          | Dec – Feb (winter)       | 1          | -         | -       |
|                                 | Sep – Nov (autumn)       | 0.29       | 0.2-0.42  | <0.001* |
|                                 | Mar – May (spring)       | 0.82       | 0.65-1.04 | 0.102   |
|                                 | Jun – Aug (summer)       | 0.19       | 0.11-0.29 | <0.001* |

\*Significant or borderline significant at 5% alpha-level. CI=confidence interval. <sup>†</sup>GP: general practice; Hospital: inpatients and outpatients; <sup>‡</sup>Pre-pandemic: January 2005 – April 2009, pandemic: May 2009 – February 2011, post-pandemic: March 2011 – September 2017.

**Table S6: Multivariable logistic regression analysis of factors associated with CoV-OC43 detections**

| Explanatory variable            | Levels                   | Odds ratio | 95% CI    | p-value |
|---------------------------------|--------------------------|------------|-----------|---------|
| Age group                       | 1-5y (Reference)         | 1          | -         | -       |
|                                 | <1y                      | 1.01       | 0.79-1.29 | 0.95    |
|                                 | 6-16y                    | 0.55       | 0.4-0.74  | <0.001* |
|                                 | 17-45y                   | 0.66       | 0.53-0.83 | <0.001* |
|                                 | 46-64y                   | 0.87       | 0.71-1.08 | 0.21    |
|                                 | ≥65y                     | 1          | 0.82-1.23 | 0.981   |
| Sex                             | Female (Reference)       | 1          | -         | -       |
|                                 | Male                     | 1.04       | 0.91-1.18 | 0.562   |
| Healthcare setting <sup>†</sup> | GP (Reference)           | 1          | -         | -       |
|                                 | Hospital                 | 0.7        | 0.6-0.81  | <0.001* |
| Time period <sup>‡</sup>        | Pre-pandemic (Reference) | 1          | -         | -       |
|                                 | Pandemic                 | 1.05       | 0.81-1.34 | 0.708   |
|                                 | Post-pandemic            | 0.96       | 0.82-1.14 | 0.656   |
| Season                          | Dec – Feb (winter)       | 1          | -         | -       |
|                                 | Sep – Nov (autumn)       | 0.15       | 0.12-0.2  | <0.001* |
|                                 | Mar – May (spring)       | 0.49       | 0.43-0.57 | <0.001* |
|                                 | Jun – Aug (summer)       | 0.09       | 0.07-0.13 | <0.001* |

\*Significant at 5% alpha-level. CI=confidence interval. <sup>†</sup>GP: general practice; Hospital: inpatients and outpatients; <sup>‡</sup>Pre-pandemic: January 2005 – April 2009, pandemic: May 2009 – February 2011, post-pandemic: March 2011 – September 2017.

**Table S7: Multivariable logistic regression analysis of factors associated with CoV-NL63 detections**

| Explanatory variable            | Levels                   | Odds ratio | 95% CI    | p-value |
|---------------------------------|--------------------------|------------|-----------|---------|
| Age group                       | 1-5y (Reference)         | 1          | -         | -       |
|                                 | <1y                      | 1.41       | 1.04-1.91 | 0.026*  |
|                                 | 6-16y                    | 0.69       | 0.47-0.99 | 0.05*   |
|                                 | 17-45y                   | 0.63       | 0.47-0.85 | 0.003*  |
|                                 | 46-64y                   | 0.54       | 0.39-0.74 | <0.001* |
|                                 | ≥65y                     | 0.48       | 0.34-0.67 | <0.001* |
| Sex                             | Female (Reference)       | 1          | -         | -       |
|                                 | Male                     | 1.14       | 0.94-1.37 | 0.182   |
| Healthcare setting <sup>†</sup> | GP (Reference)           | 1          | -         | -       |
|                                 | Hospital                 | 0.59       | 0.47-0.73 | <0.001* |
| Time period <sup>‡</sup>        | Pre-pandemic (Reference) | 1          | -         | -       |
|                                 | Pandemic                 | 1.13       | 0.8-1.58  | 0.469   |
|                                 | Post-pandemic            | 0.8        | 0.64-1.01 | 0.056*  |
| Season                          | Dec – Feb (winter)       | 1          | -         | -       |
|                                 | Sep – Nov (autumn)       | 0.21       | 0.14-0.31 | <0.001* |
|                                 | Mar – May (spring)       | 1.05       | 0.86-1.29 | 0.614   |
|                                 | Jun – Aug (summer)       | 0.18       | 0.11-0.27 | <0.001* |

\*Significant or borderline significant at 5% alpha-level; CI=confidence interval. <sup>†</sup>GP: general practice; Hospital: inpatients and outpatients; <sup>‡</sup>Pre-pandemic: January 2005 – April 2009, pandemic: May 2009 – February 2011, post-pandemic: March 2011 – September 2017.

**Table S8: Investigating viruses interacting with CoV-OC43 using multivariable binary logistic regression (AUC=79.6%, 95% CI=76.46%-82.75%)**

| Explanatory variable          | Levels                   | Odds ratio | 95% CI    | p-value             |
|-------------------------------|--------------------------|------------|-----------|---------------------|
| Age group                     | 1-5y (Reference)         | 1          | -         | -                   |
|                               | <1y                      | 1.27       | 0.85-1.88 | 0.236               |
|                               | 6-16y                    | 0.55       | 0.26-1.06 | 0.093               |
|                               | 17-45y                   | 0.7        | 0.42-1.14 | 0.161               |
|                               | 46-64y                   | 0.74       | 0.43-1.23 | 0.256               |
|                               | >64y                     | 1.09       | 0.68-1.71 | 0.723               |
| Sex                           | Female (Reference)       | 1          | -         | -                   |
|                               | Male                     | 1.77       | 1.32-2.39 | <0.001              |
| Healthcare setting*           | GP (Reference)           | 1          | -         | -                   |
|                               | Hospital                 | 0.96       | 0.67-1.43 | 0.853               |
| Time period†                  | Pre-pandemic (Reference) | 1          | -         | -                   |
|                               | Pandemic                 | 1.05       | 0.56-1.9  | 0.874               |
|                               | Post-pandemic            | 0.78       | 0.46-1.31 | 0.34                |
| CoV-OC43 infection frequency‡ | -                        | 2.91       | 2.41-3.54 | <0.001              |
| CoV-OC43 testing frequency‡   | -                        | 0.47       | 0.33-0.66 | <0.001              |
| IAV infection                 | No (Reference)           | 1          | -         | -                   |
|                               | Yes                      | 0.9        | 0.52-1.5  | 0.682               |
| IBV infection                 | No (Reference)           | 1          | -         | -                   |
|                               | Yes                      | 0.93       | 0.44-1.83 | 0.849               |
| RV infection                  | No (Reference)           | 1          | -         | -                   |
|                               | Yes                      | 1.1        | 0.72-1.65 | 0.653               |
| RSV infection                 | No (Reference)           | 1          | -         | -                   |
|                               | Yes                      | 1.68       | 1.05-2.63 | 0.027 <sup>a</sup>  |
| MPV infection                 | No (Reference)           | 1          | -         | -                   |
|                               | Yes                      | 0.84       | 0.39-1.62 | 0.624               |
| AdV infection                 | No (Reference)           | 1          | -         | -                   |
|                               | Yes                      | 2.93       | 1.87-4.5  | <0.001 <sup>b</sup> |
| PIV1 infection                | No (Reference)           | 1          | -         | -                   |
|                               | Yes                      | 0.71       | 0.04-3.34 | 0.741               |
| PIV2 infection                | No (Reference)           | 1          | -         | -                   |
|                               | Yes                      | 0.91       | 0.05-4.31 | 0.93                |
| PIV3 infection                | No (Reference)           | 1          | -         | -                   |
|                               | Yes                      | 2.38       | 1.28-4.17 | 0.004 <sup>b</sup>  |
| PIV4 infection                | No (Reference)           | 1          | -         | -                   |
|                               | Yes                      | 0.73       | 0.12-2.38 | 0.664               |

<sup>a</sup> Significant at 5% alpha-level pre-correction for multiple comparisons. <sup>b</sup> Significance upheld following Holm's correction for multiple comparisons: AdV corrected p<0.001; PIV3 corrected p=0.036. CI=confidence interval. \*GP: general practice; Hospital: inpatients and outpatients; †Pre-pandemic: January 2005 - April 2009; pandemic: May 2009 - February 2011; post-pandemic: March 2011 - September 2017; ‡Infection and testing frequencies adjusting for response virus seasonality; IAV=influenza A virus [H1N1 and H3N2]; IBV=influenza B virus; RV=human rhinoviruses; MPV=human metapneumovirus; AdV=adenoviruses; PIV=parainfluenza virus (types 1-4).



**Table S9: Investigating viruses interacting with CoV-229E using multivariable binary logistic regression (AUC=79.90%, 95% CI=74.32%-85.48%)**

| Explanatory variable          | Levels                   | Odds ratio | 95% CI    | p-value            |
|-------------------------------|--------------------------|------------|-----------|--------------------|
| Age group                     | 1-5y (Reference)         | 1          | -         | -                  |
|                               | <1y                      | 0.86       | 0.35-2.04 | 0.741              |
|                               | 6-16y                    | 1.32       | 0.41-3.6  | 0.61               |
|                               | 17-45y                   | 1.55       | 0.69-3.52 | 0.286              |
|                               | 46-64y                   | 2.39       | 1.13-5.23 | 0.024              |
|                               | >65y                     | 1.59       | 0.7-3.65  | 0.269              |
| Sex                           | Female (Reference)       | 1          | -         | -                  |
|                               | Male                     | 1.06       | 0.66-1.68 | 0.819              |
| Healthcare setting*           | GP (Reference)           | 1          | -         | -                  |
|                               | Hospital                 | 1          | 0.57-1.85 | 0.996              |
| Time period†                  | Pre-pandemic (Reference) | 1          | -         | -                  |
|                               | Pandemic                 | 1.08       | 0.42-2.77 | 0.873              |
|                               | Post-pandemic            | 0.63       | 0.25-1.61 | 0.321              |
| CoV-229E infection frequency‡ | -                        | 3.1        | 2.35-4.17 | <0.001             |
| CoV-229E testing frequency‡   | -                        | 0.6        | 0.36-1.01 | 0.052              |
| IAV infection                 | No (Reference)           | 1          | -         | -                  |
|                               | Yes                      | 1.23       | 0.49-2.83 | 0.641              |
| IBV infection                 | No (Reference)           | 1          | -         | -                  |
|                               | Yes                      | 0.63       | 0.16-1.93 | 0.459              |
| RV infection                  | No (Reference)           | 1          | -         | -                  |
|                               | Yes                      | 1.22       | 0.55-2.49 | 0.606              |
| RSV infection                 | No (Reference)           | 1          | -         | -                  |
|                               | Yes                      | 2.12       | 0.89-4.58 | 0.069              |
| MPV infection                 | No (Reference)           | 1          | -         | -                  |
|                               | Yes                      | 1.78       | 0.65-4.31 | 0.227              |
| AdV infection                 | No (Reference)           | 1          | -         | -                  |
|                               | Yes                      | 1.77       | 0.71-3.96 | 0.188              |
| PIVA infection                | No (Reference)           | 1          | -         | -                  |
|                               | Yes                      | 1.5        | 0.46-3.95 | 0.455              |
| PIVB infection                | No (Reference)           | 1          | -         | -                  |
|                               | Yes                      | 3.34       | 0.93-9.09 | 0.034 <sup>a</sup> |

<sup>a</sup> Result does not support significance; note 95% CI overlaps 1. \*GP: general practice; Hospital: inpatients and outpatients; †Pre-pandemic: January 2005 - April 2009; pandemic: May 2009 - February 2011; post-pandemic: March 2011 - September 2017; ‡Infection and testing frequencies adjusting for response virus seasonality; IAV=influenza A virus [H1N1 and H3N2]; IBV=influenza B virus; RV=human rhinoviruses; MPV=human metapneumovirus; AdV=adenoviruses; PIVA=parainfluenza virus (PIV) types 1 and 3 (human respirovirus genus); and PIVB=PIV2 and PIV4 (human rubulavirus genus).

**Table S10: Investigating viruses interacting with CoV-NL63 using multivariable binary logistic regression (AUC=79.95%, 95% CI=75.29%-84.61%)**

| Explanatory variable          | Levels                   | Odds ratio | 95% CI    | p-value |
|-------------------------------|--------------------------|------------|-----------|---------|
| Age group                     | 1-5y (Reference)         | 1          | -         | -       |
|                               | <1y                      | 1.6        | 0.96-2.67 | 0.072   |
|                               | 6-16y                    | 0.5        | 0.17-1.21 | 0.159   |
|                               | 17-45y                   | 0.51       | 0.23-1.05 | 0.078   |
|                               | 46-64y                   | 0.29       | 0.1-0.69  | 0.011   |
|                               | >64y                     | 0.11       | 0.02-0.39 | 0.003   |
| Sex                           | Female (Reference)       | 1          | -         | -       |
|                               | Male                     | 0.74       | 0.48-1.13 | 0.162   |
| Healthcare setting*           | GP (Reference)           | 1          | -         | -       |
|                               | Hospital                 | 0.93       | 0.54-1.71 | 0.805   |
| Time period†                  | Pre-pandemic (Reference) | 1          | -         | -       |
|                               | Pandemic                 | 0.61       | 0.26-1.29 | 0.215   |
|                               | Post-pandemic            | 0.37       | 0.17-0.78 | 0.01    |
| CoV-NL63 infection frequency‡ | -                        | 2.58       | 1.88-3.59 | <0.001  |
| CoV-NL63 testing frequency‡   | -                        | 0.69       | 0.42-1.15 | 0.151   |
| IAV infection                 | No (Reference)           | 1          | -         | -       |
|                               | Yes                      | 0.49       | 0.17-1.23 | 0.154   |
| IBV infection                 | No (Reference)           | 1          | -         | -       |
|                               | Yes                      | 0.67       | 0.2-1.89  | 0.478   |
| RV infection                  | No (Reference)           | 1          | -         | -       |
|                               | Yes                      | 1.03       | 0.53-1.92 | 0.916   |
| RSV infection                 | No (Reference)           | 1          | -         | -       |
|                               | Yes                      | 1.23       | 0.58-2.45 | 0.566   |
| MPV infection                 | No (Reference)           | 1          | -         | -       |
|                               | Yes                      | 0.82       | 0.26-2.08 | 0.698   |
| AdV infection                 | No (Reference)           | 1          | -         | -       |
|                               | Yes                      | 1.26       | 0.61-2.44 | 0.507   |
| PIV1 infection                | No (Reference)           | 1          | -         | -       |
|                               | Yes                      | 1.26       | 0.07-6.15 | 0.823   |
| PIV3 infection                | No (Reference)           | 1          | -         | -       |
|                               | Yes                      | 1.52       | 0.6-3.4   | 0.339   |
| PIV4 infection                | No (Reference)           | 1          | -         | -       |
|                               | Yes                      | 0.73       | 0.04-3.57 | 0.764   |

CI=confidence interval. \*GP: general practice; Hospital: inpatients and outpatients; †Pre-pandemic: January 2005 - April 2009; pandemic: May 2009 - February 2011; post-pandemic: March 2011 - September 2017; ‡Infection and testing frequencies adjusting for response virus seasonality; IAV=influenza A virus [H1N1 and H3N2]; IBV=influenza B virus; RV=human rhinoviruses; MPV=human metapneumovirus; AdV=adenoviruses; PIV=parainfluenza virus (types 1,3 or 4). Note parainfluenza type 2 was excluded from this analysis due to zero observed coinfections.
